# Supplementary material for: Infodemiological Study on COVID-19 Epidemic and COVID-19 Infodemic
Source: Preprints.org preprint supplement (doi:10.20944/preprints202002.0380.v3), 2020-03-16
Supplement: Supplementary file 1 [file supplementary]

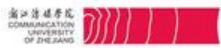

Home

Contacts

Application...

Inbox

Re: histori...

Check

Compose

&lt;&lt; Back

Reply

Reply to all

Forward

Delete

Report

Mark as

Move to

More

Inbox

Red Flag

To-do

Starred

Drafts

Sent

Other 3 folders

Labels

Pop folder

File Center

## Re: historical materials on the coinage of "coronaviruses" or "coronavirus" [EXTERNAL]

From: McIntosh, Kenneth <Kenneth.McIntosh@childrens.harvard.edu>

To: 胡智文 <huzhiw@cuz.edu.cn>

Date: 03/03/2020 02:08 Tuesday

Dear Dr. Zhiwen Hu,

I apologize for my long silence on the subject of the naming of coronaviruses. My silence was due to two things. First, I am very busy reviewing manuscripts submitted to various journals on the SARS-CoV-2 and COVID-19. Second, I was very interested to learn that David Tyrrell had not been the originator of the name "coronavirus", but rather Prof. Waterson. I verified that what you said was TRUE, and that it was reported in Tyrrell's book review of Waterson's History of Virology in the BMJ in 1979. I wonder how you found that reference! I was not aware of this. Of course, I was a young man at the time of the adoption of the name, and all the knowledge I had was either through correspondence (letters) or from talking with my laboratory supervisor, Dr. Robert Chanock.

Since the idea for the name "coronavirus" did come from Prof. Waterson, I hope you will say that in your article on the naming.

As for the other individuals on the Nature, I have nothing to add to what you have recorded. I knew Drs. Almeida, Hamre, and Tyrrell, but did not know Drs. Berry, Cunningham, or Mallucci, all of whom worked with animal coronaviruses (IBV or MHV).

I hope you are well. It seems as though the U.S. will be struggling with SARS-CoV-2 over the next year or more. We can learn from China, I think.

Yours sincerely,

Ken McIntosh

Kenneth McIntosh, M.D.

Professor of Pediatrics

Harvard Medical School

Division of Infectious Diseases

Boston Children's Hospital

Enders Room 751

Office Tel 617-919-1229
